# 1 Multi-layered networks of SalmoNet2 2 enable strain comparisons of the 3 *Salmonella* genus on a molecular level

4  
5  
6

7 Marton Olbei <sup>1,2</sup>, Balazs Bohar <sup>1,3</sup>, David Fazekas <sup>1,3</sup>, Matthew Madgwick <sup>1,2</sup>, Padhmanand  
8 Sudhakar <sup>1,2,4</sup>, Isabelle Hautefort <sup>1</sup>, Aline Métris <sup>2</sup>, Jozsef Baranyi <sup>2,5</sup>, Robert A. Kingsley <sup>2,6</sup>,  
9 Tamas Korcsmaros <sup>1,2</sup>

10 <sup>1</sup> Earlham Institute, Norwich, UK

11 <sup>2</sup> Quadram Institute Biosciences, Norwich, UK

12 <sup>3</sup> Eotvos Lorand University, Budapest, Hungary

13 <sup>4</sup> KU Leuven, Leuven, Belgium

14 <sup>5</sup> Institute of Nutrition, University of Debrecen, Debrecen, Hungary

15 <sup>6</sup> School of Biological Sciences, University of East Anglia, Norwich, UK

16

## 17 Abstract

18 Serovars of the genus *Salmonella* primarily evolved as gastrointestinal pathogens in a wide  
19 range of hosts. Some serotypes later evolved further, adopting a more invasive lifestyle in a  
20 narrower host range associated with systemic infections. A system-level knowledge of these  
21 pathogens has the potential to identify the complex adaptations associated with the evolution  
22 of serovars with distinct pathogenicity, host range and risk to human health. This promises to  
23 aid the design of interventions and serve as a knowledge base in the *Salmonella* research  
24 community. Here we present SalmoNet2, a major update to SalmoNet, the first multi-layered  
25 interaction resource for *Salmonella* strains, containing protein-protein, transcriptional  
26 regulatory and enzyme enzyme interactions. The new version extends the number of  
27 *Salmonella* genomes from 11 to 20, including strains such as *S. Typhimurium* D23580, an  
28 epidemic multidrug-resistant strain leading to invasive non-typhoidal *Salmonella* Disease

29 (iNTS), and a strain from *Salmonella bongori*, another species in the *Salmonella* genus. The  
30 database now uses strain specific metabolic models instead of a generalised model to  
31 highlight differences between strains. This has increased the coverage of high-quality protein-  
32 protein interactions, and enhances interoperability with other computational resources by  
33 adopting standardised formats. The resource website has been updated with tutorials to help  
34 researchers analyse their *Salmonella* data using molecular interaction networks from  
35 SalmoNet2. SalmoNet2 is accessible at <http://salmonet.org/>.

36

## 37 Importance

38 Multi-layered network databases collate information from multiple sources, and are powerful  
39 both as a knowledge base and platform for analysis. Here we present SalmoNet2, an  
40 integrated network resource of 20 *Salmonella* strains, containing protein-protein,  
41 transcriptional regulatory, and metabolic interactions. Key improvements to the update  
42 include expanding the number of strains, strain-specific metabolic networks, an increase in  
43 high quality protein-protein interactions, community standard computational formats to help  
44 interoperability, and online tutorials to help users analyse their data using SalmoNet2.

45

## 46 Introduction

47

48 Serovars of the genus *Salmonella* are enteric pathogens, capable of causing a self-limiting  
49 gastrointestinal inflammatory disease in a variety of animals. The host species, depending on  
50 the *Salmonella* subspecies, range from cold-blooded vertebrates to humans. *Salmonella*  
51 infection is one of the most common foodborne or waterborne illnesses resulting in  
52 approximately 94 million illnesses, and 155,000 deaths each year<sup>1-3</sup>.

53

54 Of six subspecies of *Salmonella enterica*, a small number of subspecies I serovars have  
55 adapted to cause an invasive infection in a restricted host range, instead of a self-limiting  
56 gastrointestinal inflammation typical of *Salmonella* serovars. These extraintestinal  
57 *Salmonella* strains, including the typhoidal strains that are human adapted, emerged on  
58 multiple occasions independently. A hallmark of adaptation is genomic and phenotypic

59 changes, including loss of function mutations in genes related to adaptation to specific niches  
60 in their host commonly affecting anaerobic metabolism, virulence genes, chemotaxis or  
61 motility <sup>4</sup>.

62

63 *S. Typhi* is an ancient pathogen and the most common extraintestinal *Salmonella* serovar  
64 affecting humans. Over the past decades, another group of *Salmonella* appeared as one of the  
65 most commonly isolated pathogens from the blood of patients, particularly in sub-Saharan  
66 Africa <sup>5</sup>. The invasive nontyphoidal *Salmonella* (iNTS) strains, in common with *S. Typhi* and  
67 *S. Paratyphi*, cause a systemic infection. Unlike *S. Typhi*, iNTS commonly affects  
68 immunocompromised individuals or young children, leading to bacteremia and meningitis.  
69 iNTS is most often caused by specific genotypes of *S. Typhimurium* and *S. Enteritidis* that  
70 are distinct from genotypes of these serovars commonly associated with gastrointestinal  
71 infections outside of sub-Saharan Africa <sup>6-8</sup>.

72 The *Salmonella* genus contains pathogens with diverse host range and pathogenicity, and  
73 dissecting the specific differences between gastrointestinal and extraintestinal strains have  
74 been pursued by a multitude of means <sup>4,9,10</sup>. Previously, we constructed SalmoNet, a multi-  
75 layered network resource for 10 *Salmonella* serovars that integrated protein-protein,  
76 regulatory and metabolic information <sup>11</sup>. With its multi-layered networks SalmoNet can serve  
77 as a knowledge base for the community and aid in understanding *Salmonella* pathogenesis  
78 and evolution by mapping the differences in molecular interactions between *Salmonella*  
79 pathovars on multiple biological levels. This systems level information allows researchers to  
80 enhance the information content of their own studies, by adding interaction context to the  
81 changes observed on a genomic or transcriptome level.

82

83 Here we present SalmoNet2, an update to the first public multi-layered network resource for  
84 *Salmonella* research. The new version extends the coverage of strains from 11 to 20,  
85 including an important iNTS strain, and strains outside of subspecies *enterica*, from  
86 subspecies *arizonae* and *Salmonella bongori*. To aid interoperability in computational  
87 biology the database adopted the PSI-MI TAB format, and is now accessible through the  
88 NDEx network repository. In addition, we show how rewiring of the network information can  
89 be utilised by the research community to understand aspects of *Salmonella* evolution, the  
90 step-by-step workflows of which are now accessible through tutorials on our website.

91

92

93

## 94 Results

### 95 SalmoNet2 extends out of subspecies I

96 SalmoNet2 adds 9 new multi-layered networks of *Salmonella* strains in the database  
97 compared to the first version. Included amongst others are commonly used laboratory strains,  
98 additional extraintestinal strains, including *S. Typhimurium* strain D23580, a well  
99 characterised pathogen associated with invasive non-typhoidal *Salmonella* (iNTS) disease, a  
100 strain of *Salmonella bongori*, and a member of a different subspecies (subsp. *arizonae*)  
101 within *Salmonella enterica*. The extended coverage captures a larger variety of the  
102 *Salmonella* genus, and for the first time provides interaction networks for strains from outside  
103 of subspecies *enterica* (Supplementary Table I). To define the phylogenetic relationship of  
104 the strains included in the database we constructed a neighbour-joining tree from variation in  
105 the core genome nucleotide sequence, and compared this with hierarchical classification trees  
106 based on matrix representation of protein-protein, regulatory and metabolic networks (Figure  
107 1).

108

109 ***Figure 1. Core genome SNP based phylogenetic tree, and hierarchical classification of***  
110 ***network layers. Extraintestinal (EI) serovars labelled with red, gastrointestinal (GI) serovars***  
111 ***with blue labels. A., Neighbour-joining tree from core genome SNPs of the strains. B-D.,***  
112 ***Hierarchical classification trees based on matrix representation of protein-protein,***  
113 ***regulatory and metabolic networks. The five letter labels encode for the names of the***  
114 ***different strains (for details of the encoding please refer to Supplementary Table 1).***

115

116 The topology was in accordance with previously published phylogenies<sup>12</sup> with no clear  
117 clustering of extraintestinal and gastrointestinal serovars in the phylogenetic tree. This is  
118 consistent with observations in previous works in the literature, where the extraintestinal and  
119 gastrointestinal strains could not be distinguished based on genomic dendrograms, and  
120 consistent with the independent emergence of extraintestinal serovars from gastrointestinal  
121 serovars, through a convergent evolutionary process<sup>13,14</sup>.

## 122 SalmoNet2 increases the information content of the individual 123 network layers

124 We included a number of methodological improvements to the workflow of the Salmonet1  
125 database, leading to an increased number of high quality interactions for the individual  
126 network layers. To increase the coverage of the protein-protein interactions without  
127 compromising quality, we have used the IntAct MIscore when extrapolating orthologous  
128 interaction information from the IntAct database <sup>15</sup>. Instead of relying on one experimental  
129 method as in the first version, using the MIscore as a quality filter permitted extending the  
130 number of available high-quality protein-protein interactions that we could use to establish  
131 orthologous protein-protein interactions from the commensal bacteria *Escherichia coli*  
132 (Supplementary Figure 1).

133

134 By utilising a strain-specific genome-scale metabolic model for each strain developed  
135 previously (*Seif et al.*), instead of a general model (*Thiele et al.*), the metabolic layer now  
136 includes more enzyme-enzyme relationships, where two proteins are connected if a  
137 metabolite produced by one is a substrate for another <sup>16-18</sup>, leading to a more complete  
138 description of the metabolic capabilities of the strains. The information content of Position-  
139 Specific Scoring Matrices (PSSMs) that are required to carry out genome-wide regulatory  
140 scans were enhanced with novel binding sites published since the first version of the  
141 database, and from new data uploaded to the CollecTF repository <sup>19</sup>. The total number of  
142 interactions has been increased from 81,514 to 270,215, primarily due to the expansion of the  
143 PPI layer, and the increase in the number of involved strains. The composition of the  
144 consensus network, comprised of shared interactions amongst all strains included in the  
145 database, slightly changed from the first version of SalmoNet, indicating the shifts caused by  
146 the updated data sources and expanded strain repertoire. 24.4% of regulatory interactions (up  
147 from 16%), 68.1% of PPI interactions (down from 72%), and 51.8% (down from 69%) of  
148 metabolic interactions were shared amongst all strains, forming the core network of  
149 *Salmonella* interactions. Figure 2 shows the changes in the size of the networks and  
150 individual layers compared to the first version.

151

152 **Figure 2. Comparison of SalmoNet2 with the first version.** A: main data sources and  
153 interactions in SalmoNet2. B: comparison of network size in SalmoNet 1 and SalmoNet2. C:  
154 comparison of layer size in terms of participating nodes. D: comparison of layer size in terms

155 *of interactions between SalmoNet and SalmoNet2. The five letter codes encoding for the*  
156 *different strains can be found in Supplementary Table 1.*

157

## 158 **Novel formats improve interoperability**

159 In addition to the previously used formats (.csv, .cys.), we extended the output format data to  
160 help computational biologists access network information in SalmoNet2. We now provide  
161 networks in the community standard PSI-MITAB format as well, which contains a strictly  
162 regulated vocabulary for interaction data, helping interoperability between network resources,  
163 a prerequisite for inclusion in the PSICQUIC ecosystem <sup>20</sup>. Using standardised formats  
164 improves the interoperability with other network information repositories, and provides space  
165 to maximise each interaction with as much data as possible, in a controlled and transparent  
166 manner <sup>20</sup>. This further strengthened the information content of the database, and improved  
167 the potential use cases beyond network analysis. To enable the networks to be directly  
168 accessible from the widely used Cytoscape network analysis program, we have also  
169 deposited them to the NDEx network repository <sup>21</sup>.

## 170 **Website enhancements for a user-friendly experience**

171 The SalmoNet website was enhanced compared to the previous version. We now carry new  
172 locus tag identifiers for all *Salmonella* strains to enable users to map their experimental data  
173 to the SalmoNet2 interaction networks. As part of our shift to OMA as the source of  
174 orthology for *Salmonella* proteins, SalmoNet2 now directly links to the respective OMA  
175 pages and sequence data instead of Uniprot <sup>22</sup>. Where possible, Uniprot data is still accessible  
176 through OMA <sup>23</sup>.

177 During the lifecycle of SalmoNet1, we identified a bottleneck with our putative users. The  
178 interaction network format, while potentially useful for scientists with a microbiology  
179 background, proved difficult to use, which led to potentially less user retention. To combat  
180 this, we have created a new tab on the website containing tutorials as an introduction to  
181 network analysis using the SalmoNet2 database. These tutorials enable analyses shown in this  
182 article. We plan to add additional tutorials, workflows and examples to the website in the  
183 future, to further increase the usability of the platform.

## 184 Case study: network rewiring to identify functional differences in 185 *Salmonella enterica*

186 Network rewiring entails many approaches aimed at quantifying changes between interaction  
187 networks, and has been used to identify differences between interaction networks<sup>24,25</sup>. In this  
188 work, we compared the degree of interaction rewiring between the interactomes of four host  
189 adapted typhoidal *Salmonella* strains and four gastrointestinal *Salmonella* strains to explore  
190 the utility of a multi-layered network resource such as SalmoNet2. We compared the most  
191 rewired subgraphs of the two types of strains to find the causes of the rewiring.

192

193 In general, the most rewired nodes were global regulators, such as Crp, Fis and Fur. The  
194 significantly enriched functions are similar between the compared strains, with a few key  
195 differences. For example, the ferric uptake regulator Fur senses metal concentration and  
196 redox state of cells, and regulates many operons and genes involved in these processes<sup>26</sup>.  
197 Interestingly, Fur is enriched in the GO function “iron ion homeostasis” in all included  
198 gastrointestinal strains, while this enrichment is absent from the typhoidal strains. Upon  
199 further inspection of the genes responsible for the enrichment of the term and their  
200 orthologous status, Fur is missing interactions present in GI strains towards the genes *fhuA*,  
201 *fhuE*, caused by the disruption of coding sequences in these genes in typhoidal serovars, as  
202 highlighted previously in the literature<sup>13,27</sup>. Similarly, Fur is enriched in the term “cell  
203 adhesion” in all gastrointestinal strains, whereas this function is not enriched in typhoidal  
204 strains, except *S. Paratyphi C*. Inspection of the genes underlying the enrichment result  
205 revealed that the culprit behind the mismatch in functional enrichment is the  
206 pseudogenization and subsequent missing interactions with the genes *stiH* and *stiA* in the rest  
207 of the typhoidal *Salmonella* strains, two genes responsible for the production of fimbriae,  
208 highlighted previously in the literature<sup>13</sup>. From the top 50 most rewired nodes, on average 33  
209 nodes had at least one pseudogene first neighbour in the typhoidal serovars, and on average  
210 4% of the first neighbours of the top 50 most rewired nodes were pseudogenes. In the  
211 gastrointestinal strains, on average 7 nodes had pseudogene first neighbours, and only 1% of  
212 their first neighbours were pseudogenes.

213 While a large part of the rewiring was due to gene loss in typhoidal and extraintestinal  
214 serovars, we found examples where the cause of rewiring was due to the exclusivity of genes  
215 to the extraintestinal group. Two proteins, YreP and YjcS, are present in all typhoidal and  
216 extraintestinal strains of *Salmonella* included in SalmoNet2. However, they are missing from

217 all gastrointestinal strains bar one. The protein YjcS has an orthologue in *S. Enteritidis*, but  
218 the protein is otherwise missing from the gastrointestinal group. The genes share an upstream  
219 regulatory region, and are predicted to interact with the regulators HilC, RtsA and Fur. The  
220 *yreP* and *yjcS* genes were first described together in *Escherichia coli*, in two analysed strains:  
221 *E. coli* SMS-3-5, an environmental pathogenic isolate with multiple antibiotic resistances,  
222 and *E. coli* (NMEC) O7:K1 strain CE10, causing neonatal meningitis. The first gene, *yreP*  
223 (*dgcY* in *E. coli*), encodes a putative diguanylate cyclase, based on the presence of a GGDEF  
224 domain<sup>28,29</sup>. Diguanylate-cyclases facilitate the production of c-di-GMP, a ubiquitous  
225 secondary messenger metabolite in prokaryotes<sup>28,29</sup>. The second gene, *yjcS* (EcSMS35\_1714  
226 in *E. coli*), is an alkyl-sulfatase. This enzyme has been first described in *Pseudomonas spp.*,  
227 where a strain carrying this enzyme was able to grow on the surfactant sodium dodecyl  
228 sulphate (SDS), and the gene has been characterised in *E. coli* as well<sup>30,31</sup>.

229

230 After noting their presence in the extraintestinal strains included in SalmoNet2, we expanded  
231 the search into a more expansive data source, pubMLST, to see if this split was representative  
232 of the serovars as a whole, and not just the specific strains in SalmoNet2<sup>32</sup>. Figure 3 shows  
233 the results of the BLAST searches in the pubMLST database.

234

235 **Figure 3. Prevalence of the *yreP* + regulatory region + *yjcS* segment in *Salmonella***  
236 ***serovars based on BLAST hits. The top 10 serovars have been described previously as***  
237 ***sources of invasive illness.***

238

239 In total 83% of BLAST hits come from well-known extraintestinal serovars, dominated by *S.*  
240 Typhi strains (Figure 3). The top 10 serovars in terms of number of hits are mostly invasive  
241 serovars: *S. Typhi*, *S. Paratyphi A*, and *S. Paratyphi C* are notable typhoidal serovars adapted  
242 to humans, *S. Dublin*, *S. Pullorum* and *S. Choleraesuis* are well-known host adapted serovars  
243 of cattle, poultry and pigs<sup>4,11</sup>. *S. Napoli* is an emerging serovar in Europe, phylogenetically  
244 closely related to *S. Paratyphi A*, carrying an almost identical pattern of typhoid-associated  
245 genes, and capable of causing a form of invasive non-typhoidal disease<sup>33,34</sup>. The invasive  
246 behaviour is not as clear cut with the rest of the serovars, but there have been several reports  
247 of it: *S. Bovismorbificans* is capable of causing bloodstream infections, and has recently been  
248 described as an emerging disease in Malawi, converging towards a phenotype resembling a  
249 human adapted iNTS variant<sup>35</sup>. Although not strictly an extraintestinal serovar, *S. Virchow*  
250 has been known to cause invasive illness<sup>36-39</sup>. *S. Weltevreden* is an emerging cause of



251 diarrheal and sometimes invasive disease in humans in tropical regions, and may be adapted  
252 to life in aquatic hosts<sup>40,41</sup>. While large in total numbers in the database, *S. Enteritidis* only  
253 makes up 2% of the positive hits. Since *S. Enteritidis* is one of the most commonly isolated  
254 iNTS strains, there exists a possible link to invasive behaviour<sup>42,43</sup>. However, more work is  
255 needed to uncover whether the two proteins are beneficial to an extraintestinal lifestyle.  
256 This brief case study highlights how the information contained in and linked with SalmoNet2  
257 can be used to form scientific questions relating the functionality of genes to the behaviour  
258 and phylogenetics of *Salmonella*, based on molecular interaction information. SalmoNet 2  
259 contains example strains from the most prevalent serovars, and the information can further be  
260 extended using the easily accessible sequence data and homology information through OMA  
261 and other computational resources.

262

263

264

## 265 Discussion

266 By increasing the number of strains to 20 from the previous 11, SalmoNet now extends out of  
267 subspecies I., adding information on members of other subspecies (subspecies *arizonae*), or  
268 an entirely different species (*Salmonella bongori*). Developing a more compatible structure  
269 between SalmoNet, and other available large- scale evolutionary genomics tools such as  
270 OMA, there is increased potential to generate interaction networks for specific *Salmonella*  
271 strains on request, or build similar data resources for other non-model organisms<sup>44</sup>. With the  
272 change to OMA as the backbone of SalmoNet interactions, there is a great potential to study  
273 the evolutionary history of proteins, and interactions. The on-demand availability of  
274 orthologous proteins from outside of the studied organism or clade can make larger scope  
275 comparisons possible<sup>45</sup>.

276

277 The programmatic access interfaces implemented into OMA make these integrated analyses  
278 reproducible and scalable<sup>46</sup>. Orthology mapping is the most computationally intensive step of  
279 the SalmoNet workflow. The OMA standalone software can save a lot of time and resources  
280 here, since the all-against-all Smith-Waterman sequence alignments can be parallelised, both  
281 on single computers or high-performance clusters<sup>22</sup>. Adding a new strain or species in the  
282 future is also made easier, as OMA Standalone does not require an all-against-all

283 recomputing of the orthologous relationships in these cases, as pre-computed results can be  
284 submitted, in which case only the new genomes require computation time. Using OMA is not  
285 only beneficial for the orthology mapping, it is also helpful for the annotation work. The first  
286 version of SalmoNet was essentially UniProt based, with UniProt IDs serving as the primary  
287 identifiers of the database. Currently not all proteins of all strains have a matching UniProt  
288 ID, hence the OMA IDs as our new primary identifier.

289  
290 The availability of strain-specific metabolic models, and the increased specificity of PPI data,  
291 although still reliant on orthology mapping, increases the resolution of the resulting network  
292 models for non-model organisms, and the more interwoven interaction layers get, the more  
293 valuable the information content of the database gets. Although there are other resources  
294 containing *Salmonella* interaction data, such as STRING for PPI interactions, RegPrecise for  
295 regulatory interactions, or BioCyc for metabolic interactions, no other freely available  
296 resource combines the listed connection types besides SalmoNet, for multiple *Salmonella*  
297 strains<sup>47-49</sup>.

298  
299 SalmoNet2 enables the network analyses as shown with the rewiring analysis. It highlights  
300 how the information contained in and linked with SalmoNet2 can be used to inform scientific  
301 questions such as relating the functionality of genes to phenotypes and phylogenetics of  
302 *Salmonella*, based on molecular interaction information. SalmoNet2 contains example strains  
303 from the most prevalent serovars, and the information can further be extended using the  
304 easily accessible sequence data and homology information through OMA and other  
305 computational resources as shown with the pubMLSt example.

306  
307 To increase the usability and interoperability of the generated interaction information, we  
308 now utilise the PSI-MITAB format as well, quickly becoming a standard of biological  
309 network information<sup>20,50</sup>. To have the networks be directly accessible from the widely used  
310 Cytoscape network analysis program, the NDEX network repository can host them separately  
311 from the SalmoNet website, making them directly available for end-users<sup>21</sup>. Beyond their  
312 raw information content, databases are as good as their usability and availability, and the  
313 potential for SalmoNet2 data to be found and utilised in as many ways as possible is crucial  
314 for this effort to be useful for the scientific community<sup>51</sup>. To further enhance the accessibility  
315 of SalmoNet2 data we wrote detailed step-by-step tutorials describing the computational

316 steps required to perform analyses such as the comparisons involving the gastrointestinal and  
317 typhoidal strains above.

318

## 319 Methods

### 320 Updated orthology mapping tool

321 Although the main structure of the database remained the same, the underlying workflow  
322 changed. As in the first version, we mapped the orthologous proteins across the included  
323 strains. In SalmoNet 1 this was done by InParanoid, a well-established tool for this process <sup>52</sup>.  
324 In this update we used the OMA standalone software to construct these relationships,  
325 including the available *Salmonella* strains from the OMA browser database. OMA is a large-  
326 scale orthology database and toolkit, containing the orthology information and protein  
327 sequence data needed for SalmoNet in one place, including the proteomes and genomes of  
328 the strains on request, and important annotation data <sup>53</sup>.

329 It is important to note, that the outputs of the tools can be slightly different: according to a  
330 study comparing these methods the OMA standalone output OMA groups lead to a generally  
331 more precise, but also strict mapping, leading to less false positives (and true positives as  
332 well) <sup>54</sup>. We did however get very similar, and in cases better recall than we did in SalmoNet  
333 1.0 (between 69-75% overlap with the 4140 proteins from *E. coli*; Supplementary Table 1)  
334 using InParanoid.

335

### 336 Updated and novel data sources

#### 337 Protein-Protein Interaction Networks

338 The construction of the protein-protein interaction (PPI) network follows the same essential  
339 steps it did in the first version of the database, collected from multiple databases <sup>55-58</sup>. To  
340 increase the coverage of the included PPIs without losing quality, we have used the IntAct  
341 PSI-MIscore (> 0.50) when importing interaction information from the IntAct database,  
342 instead of relying on one experimental method, as in the first version (psi-mi:"MI:0096"(pull  
343 down)). Supplementary Figure 1 shows the distribution of the IntAct PSI-MIscores.

## 344 Metabolic Networks

345 SalmoNet2 uses new, strain specific genome-scale metabolic models for *Salmonella*<sup>16,17</sup>. The  
346 models used the same STM 1.0 model as a starting point SalmoNet1 did<sup>18</sup>, but updated it  
347 with new genes and reactions, and were made strain specific, leading to the metabolic models  
348 of 410 *Salmonella* strains belonging to 64 serovars. Otherwise, the workflow remained  
349 identical, resulting in enzyme-enzyme interactions, where two proteins are connected if a  
350 metabolite produced by one is a substrate for another<sup>59</sup>. Similarly, as in the first version, we  
351 have excluded links connected by metabolites partaking in more than 10 reactions<sup>59</sup>.

352

## 353 Regulatory Networks

354 The establishment of the transcriptional regulatory networks was done in an identical way to  
355 SalmoNet 1. Supplementary Figure 2 shows the workflow for the construction of the  
356 regulatory layer. The core of the network, the manually curated interactions, high-throughput  
357 data (ChIP-Seq), and low-throughput, experimentally verified interactions and data sources  
358 remained the same. The information content of Position-Specific Scoring Matrices (PSSMs)  
359 used to carry out the genome-wide scans was enhanced with novel binding sites published  
360 since the first version of the database, from new data uploaded to the CollecTF repository<sup>19</sup>.  
361 RSAT's consensus tool is no longer available on the web server, info-gibbs took its place,  
362 which is the tool that was used to construct the matrices. Similarly, as previously, RSAT  
363 retrieve-sequence was used to gather the putative promoter regions for the genomes included  
364 in SalmoNet, and matrix-scan was used to establish putative transcription factor - target gene  
365 (promoter region) pairs<sup>60</sup>.

366

## 367 Removal of pseudogenes

368 To remove all hypothetically disrupted coding DNA sequences (HDCs), the curation made by  
369 Nuccio & Bäumlér was used to remove such entries<sup>13</sup> and<sup>61,62</sup> were used to remove them  
370 from *S. Typhimurium* D23580.

371

## 372 Network rewiring

373 To calculate network rewiring we used the DyNet app in Cytoscape to calculate the rewiring  
374 value of the nodes in each group separately<sup>63</sup>. Four typhoidal strains (*S. Paratyphi* A (AKU  
375 1261), *S. Paratyphi* A (ATCC 9150), *S. Paratyphi* C (RKS4594), *S. Typhi* (Ty2) and four  
376 gastrointestinal strains (*S. Agona* (SL483), *S. Newport* (SL254), *S. Heidelberg* and *S.*  
377 *Typhimurium* (LT2)) were compared for interaction differences.

378

379 The level of rewiring was calculated across all strains, and the degree-corrected rewiring  
380 values were ordered in a descending list, where the top 50 hits were further analysed. To  
381 calculate the enrichment of Gene Ontology terms in the identified subgraphs the the up-to-  
382 date Gene Ontology annotation of the target genes was downloaded using the topGO library  
383 in R, and following that the R library clusterProfiler was used to calculate Gene Ontology  
384 enrichment with the enricher function, from Biological Process terms<sup>64,65</sup>. P-value  
385 adjustment for multiple testing was carried out with the Benjamini-Hochberg approach, using  
386 the p.adjust function in R.

387 The statistically significant enrichment results were compared side-by-side between the  
388 groups, and the differences in enrichment were further studied by comparing the sets of genes  
389 responsible for (underlying) the enriched terms, i.e., if one group was enriched in a specific  
390 term, the presence/absence of the orthologous genes responsible for the enrichment was  
391 analysed in the members of the other group.

392

393 To study the relationship of YreP and YjcS to the extraintestinal pathovar, network rewiring  
394 was calculated in an identical manner as above, but all extraintestinal and gastrointestinal  
395 strains from SalmoNet2 were involved in the comparisons. BLAST searches for the *yreP* and  
396 *yjcS* genes was done through the pubMLST website, with default parameters<sup>32</sup>. The entire  
397 genomic sequence of the genes and their shared regulatory region was queried, as taken from  
398 *S. Gallinarum* strain 287/91 (see Supplementary File 1). The hits were filtered for above 95%  
399 sequence identity, and the top 10% of bitscores to make sure the compared sequences contain  
400 both the genes and the shared regulatory region.

401

402

## 403 Data availability

404 The data generated for this study is available at the database website, <http://salmonet.org>.

405

## 406 Acknowledgements

407 The work of MO, PS, IH, TK were supported by the UKRI BBSRC Gut Microbes and Health

408 Institute Strategic Programme BB/R012490/1 and its constituent projects

409 BBS/E/F/000PR10353 and BBS/E/ F/000PR10355. MO, BB, DF, PS, IH, TK were also

410 supported by a BBSRC Core Strategic Programme Grant for Genomes to Food Security

411 (BB/CSP1720/1) and its constituent work packages, BBS/E/T/000PR9819 and

412 BBS/E/T/000PR9817. PS was supported by the European Research Council Advanced Grant

413 (ERC-2015-AdG, 694679, CrUCCial). MO and MM were supported by a BBSRC - Norwich

414 Research Park Biosciences Doctoral Training Partnership grant (BB/M011216/1 and

415 BB/S50743X/1). RK was supported by the UKRI Institute Strategic Programme Microbes in

416 the Food Chain BB/R012504/1 and its constituent project(s) BBS/E/F/000PR10348 and

417 BBS/E/F/000PR10349.

418

419

420

421

## 422 Bibliography

423 1. Coburn, B., Grassl, G. A. & Finlay, B. B. Salmonella, the host and disease: a brief

424 review. *Immunol. Cell Biol.* **85**, 112–118 (2007).

425 2. Hohmann, E. L. Nontyphoidal salmonellosis. *Clin. Infect. Dis.* **32**, 263–269 (2001).

426 3. Majowicz, S. E. *et al.* The global burden of nontyphoidal Salmonella gastroenteritis.

427 *Clin. Infect. Dis.* **50**, 882–889 (2010).

- 428 4. Tanner, J. R. & Kingsley, R. A. Evolution of Salmonella within Hosts. *Trends*  
429 *Microbiol.* **26**, 986–998 (2018).
- 430 5. Tsai, C. N. & Coombes, B. K. Emergence of invasive Salmonella in Africa. *Nat.*  
431 *Microbiol.* (2021) doi:10.1038/s41564-021-00864-5.
- 432 6. Gilchrist, J. J. & MacLennan, C. A. Invasive nontyphoidal salmonella disease in africa.  
433 *Ecosal Plus* **8**, (2019).
- 434 7. Feasey, N. A., Dougan, G., Kingsley, R. A., Heyderman, R. S. & Gordon, M. A.  
435 Invasive non-typhoidal salmonella disease: an emerging and neglected tropical disease in  
436 Africa. *Lancet* **379**, 2489–2499 (2012).
- 437 8. Okoro, C. K. *et al.* Intracontinental spread of human invasive Salmonella Typhimurium  
438 pathovariants in sub-Saharan Africa. *Nat. Genet.* **44**, 1215–1221 (2012).
- 439 9. Perez-Sepulveda, B. M. & Hinton, J. C. D. Functional transcriptomics for bacterial gene  
440 detectives. *Microbiol. Spectr.* **6**, (2018).
- 441 10. Langridge, G. C., Nair, S. & Wain, J. Nontyphoidalsalmonella serovars cause different  
442 degrees of invasive disease globally. *J. Infect. Dis.* **199**, 602–603 (2009).
- 443 11. Métris, A. *et al.* SalmoNet, an integrated network of ten Salmonella enterica strains  
444 reveals common and distinct pathways to host adaptation. *NPJ Syst. Biol. Appl.* **3**, 31  
445 (2017).
- 446 12. Branchu, P., Bawn, M. & Kingsley, R. A. Genome Variation and Molecular  
447 Epidemiology of Salmonella enterica Serovar Typhimurium Pathovariants. *Infect.*  
448 *Immun.* **86**, (2018).
- 449 13. Nuccio, S.-P. & Bäumler, A. J. Comparative analysis of Salmonella genomes identifies a  
450 metabolic network for escalating growth in the inflamed gut. *MBio* **5**, e00929-14 (2014).
- 451 14. Timme, R. E. *et al.* Phylogenetic diversity of the enteric pathogen Salmonella enterica  
452 subsp. enterica inferred from genome-wide reference-free SNP characters. *Genome Biol.*

- 453        *Evol.* **5**, 2109–2123 (2013).
- 454    15. Villaveces, J. M. *et al.* Merging and scoring molecular interactions utilising existing  
455        community standards: tools, use-cases and a case study. *Database (Oxford)* **2015**,  
456        (2015).
- 457    16. Seif, Y., Monk, J. M., Machado, H., Kavvas, E. & Palsson, B. O. Systems Biology and  
458        Pangenome of Salmonella O-Antigens. *MBio* **10**, (2019).
- 459    17. Seif, Y. *et al.* Genome-scale metabolic reconstructions of multiple Salmonella strains  
460        reveal serovar-specific metabolic traits. *Nat. Commun.* **9**, 3771 (2018).
- 461    18. Thiele, I. *et al.* A community effort towards a knowledge-base and mathematical model  
462        of the human pathogen Salmonella Typhimurium LT2. *BMC Syst. Biol.* **5**, 8 (2011).
- 463    19. Kılıç, S. *et al.* From data repositories to submission portals: rethinking the role of  
464        domain-specific databases in CollecTF. *Database (Oxford)* **2016**, (2016).
- 465    20. Perfetto, L. *et al.* CausalTAB: the PSI-MITAB 2.8 updated format for signalling data  
466        representation and dissemination. *Bioinformatics* **35**, 3779–3785 (2019).
- 467    21. Pillich, R. T., Chen, J., Rynkov, V., Welker, D. & Pratt, D. Ndex: A community resource  
468        for sharing and publishing of biological networks. *Methods Mol. Biol.* **1558**, 271–301  
469        (2017).
- 470    22. Altenhoff, A. M. *et al.* The OMA orthology database in 2018: retrieving evolutionary  
471        relationships among all domains of life through richer web and programmatic interfaces.  
472        *Nucleic Acids Res.* **46**, D477–D485 (2018).
- 473    23. The UniProt Consortium. UniProt: the universal protein knowledgebase. *Nucleic Acids*  
474        *Res.* **45**, D158–D169 (2017).
- 475    24. Mehta, T. K. *et al.* Evolution of regulatory networks associated with traits under  
476        selection in cichlids. *Genome Biol.* **22**, 25 (2021).
- 477    25. Treveil, A. *et al.* Regulatory network analysis of Paneth cell and goblet cell enriched gut



- 478 organoids using transcriptomics approaches. *Mol. Omics* **16**, 39–58 (2020).
- 479 26. Troxell, B., Fink, R. C., Porwollik, S., McClelland, M. & Hassan, H. M. The Fur regulon  
480 in anaerobically grown *Salmonella enterica* sv. Typhimurium: identification of new Fur  
481 targets. *BMC Microbiol.* **11**, 236 (2011).
- 482 27. Wang, Y. *et al.* Evolution and sequence diversity of fhua in salmonella and escherichia.  
483 *Infect. Immun.* **86**, (2018).
- 484 28. Povolotsky, T. L. & Hengge, R. Genome-Based Comparison of Cyclic Di-GMP  
485 Signaling in Pathogenic and Commensal *Escherichia coli* Strains. *J. Bacteriol.* **198**, 111–  
486 126 (2016).
- 487 29. Ryjenkov, D. A., Tarutina, M., Moskvina, O. V. & Gomelsky, M. Cyclic diguanylate is a  
488 ubiquitous signaling molecule in bacteria: insights into biochemistry of the GGDEF  
489 protein domain. *J. Bacteriol.* **187**, 1792–1798 (2005).
- 490 30. Liang, Y., Gao, Z., Dong, Y. & Liu, Q. Structural and functional analysis show that the  
491 *Escherichia coli* uncharacterized protein YjcS is likely an alkylsulfatase. *Protein Sci.* **23**,  
492 1442–1450 (2014).
- 493 31. Williams, J. & Payne, W. J. Enzymes induced in a bacterium by growth on sodium  
494 dodecyl sulfate. *Appl. Microbiol.* **12**, 360–362 (1964).
- 495 32. Jolley, K. A., Bray, J. E. & Maiden, M. C. J. Open-access bacterial population genomics:  
496 BIGSdb software, the PubMLST.org website and their applications. [version 1; peer  
497 review: 2 approved]. *Wellcome Open Res.* **3**, 124 (2018).
- 498 33. Gori, M. *et al.* High-resolution diffusion pattern of human infections by *Salmonella*  
499 *enterica* serovar Napoli in Northern Italy explained through phylogeography. *PLoS ONE*  
500 **13**, e0202573 (2018).
- 501 34. Huedo, P. *et al.* *Salmonella enterica* Serotype Napoli is the First Cause of Invasive  
502 Nontyphoidal Salmonellosis in Lombardy, Italy (2010-2014), and Belongs to Typhi

- 503 Subclade. *Foodborne Pathog. Dis.* **14**, 148–151 (2017).
- 504 35. Bronowski, C. *et al.* Genomic characterisation of invasive non-typhoidal Salmonella  
505 enterica Subspecies enterica Serovar Bovismorbificans isolates from Malawi. *PLoS*  
506 *Negl. Trop. Dis.* **7**, e2557 (2013).
- 507 36. Eckerle, I., Zimmermann, S., Kapaun, A. & Junghanss, T. Salmonella enterica serovar  
508 Virchow bacteremia presenting as typhoid-like illness in an immunocompetent patient. *J.*  
509 *Clin. Microbiol.* **48**, 2643–2644 (2010).
- 510 37. Mani, V., Brennand, J. & Mandal, B. K. Invasive illness with Salmonella virchow  
511 infection. *Br. Med. J.* **2**, 143–144 (1974).
- 512 38. Messer, R. D., Warnock, T. H., Heazlewood, R. J. & Hanna, J. N. Salmonella meningitis  
513 in children in far north Queensland. *J. Paediatr. Child Health* **33**, 535–538 (1997).
- 514 39. Todd, W. T. & Murdoch, J. M. Salmonella virchow: a cause of significant bloodstream  
515 invasion. *Scott. Med. J.* **28**, 176–178 (1983).
- 516 40. Hounmanou, Y. M. G. *et al.* Molecular characteristics and zoonotic potential of  
517 salmonella weltevreden from cultured shrimp and tilapia in vietnam and china. *Front.*  
518 *Microbiol.* **11**, 1985 (2020).
- 519 41. Makendi, C. *et al.* A Phylogenetic and Phenotypic Analysis of Salmonella enterica  
520 Serovar Weltevreden, an Emerging Agent of Diarrheal Disease in Tropical Regions.  
521 *PLoS Negl. Trop. Dis.* **10**, e0004446 (2016).
- 522 42. Feasey, N. A. *et al.* Distinct Salmonella Enteritidis lineages associated with enterocolitis  
523 in high-income settings and invasive disease in low-income settings. *Nat. Genet.* **48**,  
524 1211–1217 (2016).
- 525 43. Gordon, M. A. Invasive nontyphoidal Salmonella disease: epidemiology, pathogenesis  
526 and diagnosis. *Curr. Opin. Infect. Dis.* **24**, 484–489 (2011).
- 527 44. Olbei, M., Kingsley, R. A., Korcsmaros, T. & Sudhakar, P. Network Biology

- 528 Approaches to Identify Molecular and Systems-Level Differences Between Salmonella  
529 Pathovars. *Methods Mol. Biol.* **1918**, 265–273 (2019).
- 530 45. Demeter, A. *et al.* ULK1 and ULK2 are less redundant than previously thought:  
531 computational analysis uncovers distinct regulation and functions of these autophagy  
532 induction proteins. *Sci. Rep.* **10**, 10940 (2020).
- 533 46. Kaleb, K., Warwick Vesztröcy, A., Altenhoff, A. & Dessimoz, C. Expanding the  
534 Orthologous Matrix (OMA) programmatic interfaces: REST API and the *OmaDB*  
535 packages for R and Python [version 2; peer review: 2 approved]. *F1000Res.* **8**, 42  
536 (2019).
- 537 47. Caspi, R. *et al.* BioCyc: A Genomic and Metabolic Web Portal with Multiple Omics  
538 Analytical Tools. *The FASEB Journal* (2019).
- 539 48. Novichkov, P. S. *et al.* RegPrecise 3.0--a resource for genome-scale exploration of  
540 transcriptional regulation in bacteria. *BMC Genomics* **14**, 745 (2013).
- 541 49. Szklarczyk, D. *et al.* STRING v11: protein-protein association networks with increased  
542 coverage, supporting functional discovery in genome-wide experimental datasets.  
543 *Nucleic Acids Res.* **47**, D607–D613 (2019).
- 544 50. Kerrien, S. *et al.* IntAct--open source resource for molecular interaction data. *Nucleic*  
545 *Acids Res.* **35**, D561-5 (2007).
- 546 51. Merali, Z. & Giles, J. Databases in peril. *Nature* **435**, 1010–1011 (2005).
- 547 52. O'Brien, K. P., Remm, M. & Sonnhammer, E. L. L. Inparanoid: a comprehensive  
548 database of eukaryotic orthologs. *Nucleic Acids Res.* **33**, D476-80 (2005).
- 549 53. Altenhoff, A. M. *et al.* OMA orthology in 2021: website overhaul, conserved isoforms,  
550 ancestral gene order and more. *Nucleic Acids Res.* (2020) doi:10.1093/nar/gkaa1007.
- 551 54. Altenhoff, A. M. *et al.* Standardized benchmarking in the quest for orthologs. *Nat.*  
552 *Methods* **13**, 425–430 (2016).

- 553 55. Calderone, A., Castagnoli, L. & Cesareni, G. mentha: a resource for browsing integrated  
554 protein-interaction networks. *Nat. Methods* **10**, 690–691 (2013).
- 555 56. Mosca, R., Céol, A. & Aloy, P. Interactome3D: adding structural details to protein  
556 networks. *Nat. Methods* **10**, 47–53 (2013).
- 557 57. Orchard, S. *et al.* The MIntAct project - IntAct as a common curation platform for 11  
558 molecular interaction databases. *Nucleic Acids Res.* **42**, D358-63 (2014).
- 559 58. Oughtred, R. *et al.* The BioGRID interaction database: 2019 update. *Nucleic Acids Res.*  
560 **47**, D529–D541 (2019).
- 561 59. Kreimer, A., Borenstein, E., Gophna, U. & Ruppin, E. The evolution of modularity in  
562 bacterial metabolic networks. *Proc Natl Acad Sci USA* **105**, 6976–6981 (2008).
- 563 60. Nguyen, N. T. T. *et al.* RSAT 2018: regulatory sequence analysis tools 20th anniversary.  
564 *Nucleic Acids Res.* **46**, W209–W214 (2018).
- 565 61. Kingsley, R. A. *et al.* Epidemic multiple drug resistant Salmonella Typhimurium causing  
566 invasive disease in sub-Saharan Africa have a distinct genotype. *Genome Res.* **19**, 2279–  
567 2287 (2009).
- 568 62. Canals, R. *et al.* Adding function to the genome of African Salmonella Typhimurium  
569 ST313 strain D23580. *PLoS Biol.* **17**, e3000059 (2019).
- 570 63. Goenawan, I. H., Bryan, K. & Lynn, D. J. DyNet: visualization and analysis of dynamic  
571 molecular interaction networks. *Bioinformatics* **32**, 2713–2715 (2016).
- 572 64. Alexa, A. & Rahnenfuhrer, J. topGO: Enrichment Analysis for Gene Ontology.  
573 <https://www.bioconductor.org/packages/release/bioc/html/topGO.html> (2021).
- 574 65. Wu, T. *et al.* clusterProfiler 4.0: A universal enrichment tool for interpreting omics data.  
575 *Innovation (N Y)* **2**, 100141 (2021).

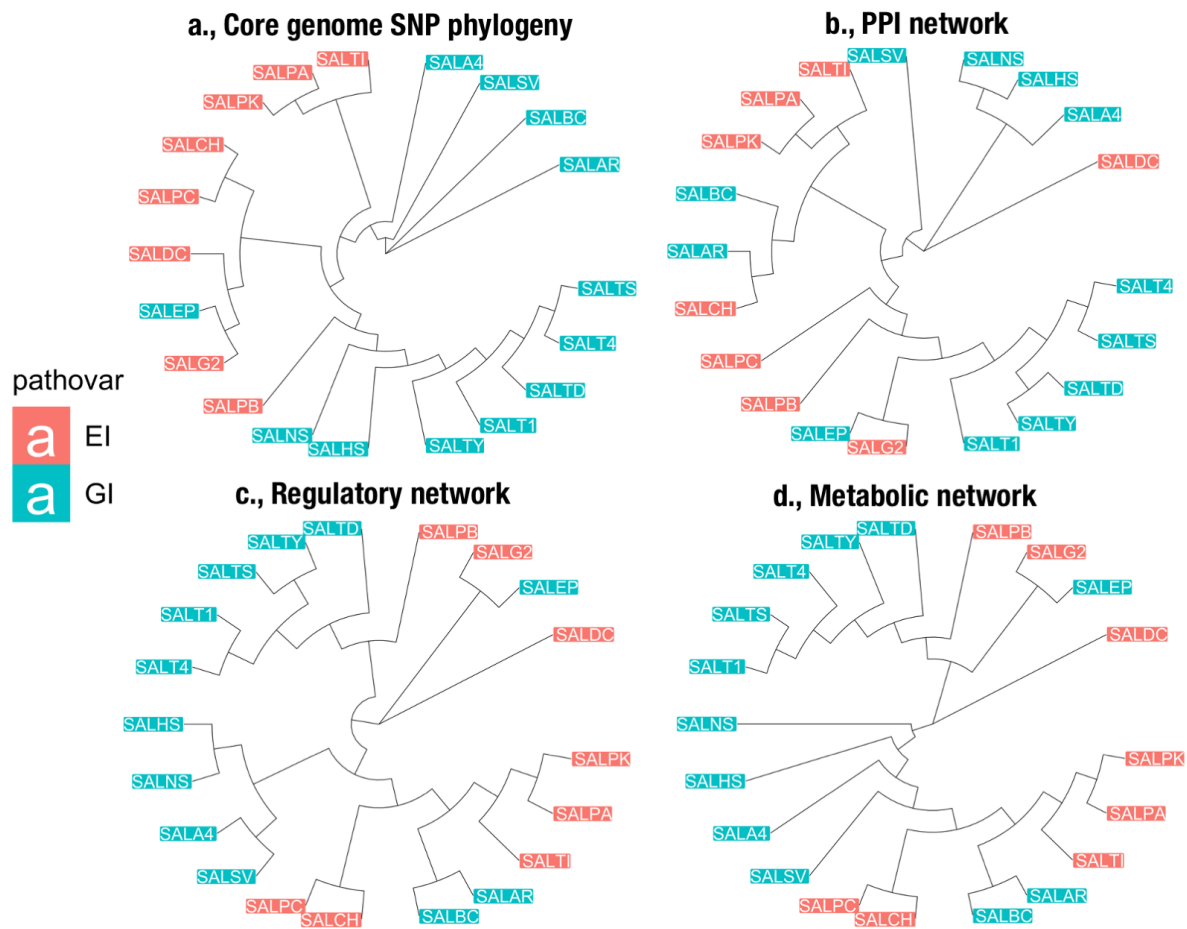

**Figure 1. Core genome SNP based phylogenetic tree, and hierarchical classification of network layers.** Extraintestinal (EI) serovars labelled with red, gastrointestinal (GI) serovars with blue labels. A., Neighbour-joining tree from core genome SNPs of the strains. B-D., Hierarchical classification trees based on matrix representation of protein-protein, regulatory and metabolic networks. The five letter labels encode for the names of the different strains (for details of the encoding please refer to Supplementary Table 1).

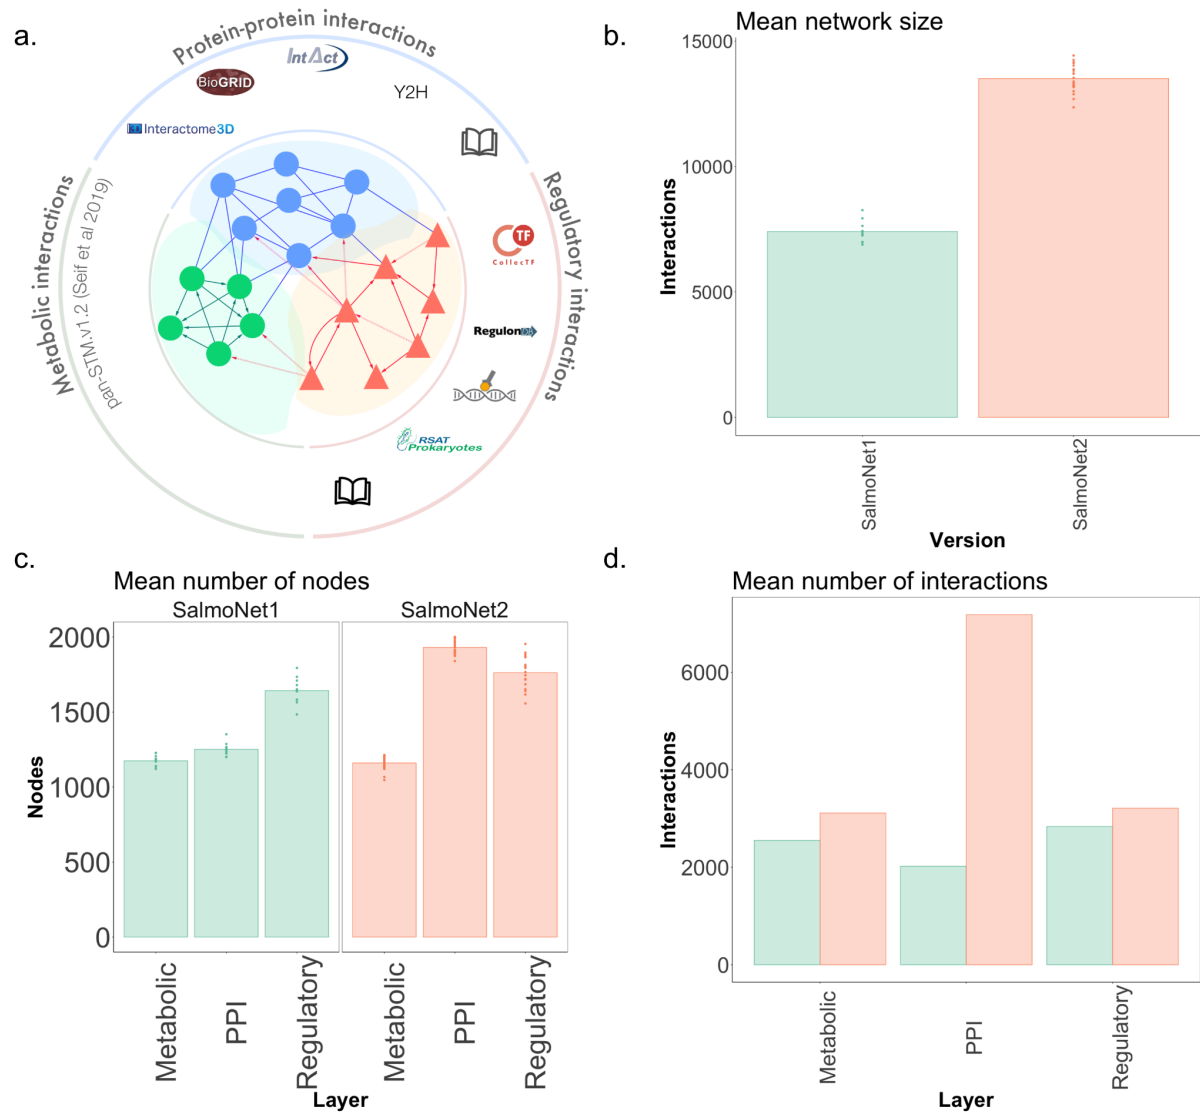

**Figure 2. Comparison of SalmoNet2 with the first version.** *A: main data sources and interactions in SalmoNet2. B: comparison of network size in SalmoNet 1 and SalmoNet2. C: comparison of layer size in terms of participating nodes. D: comparison of layer size in terms of interactions between SalmoNet and SalmoNet2. The five letter codes encoding for the different strains can be found in Supplementary Table 1.*

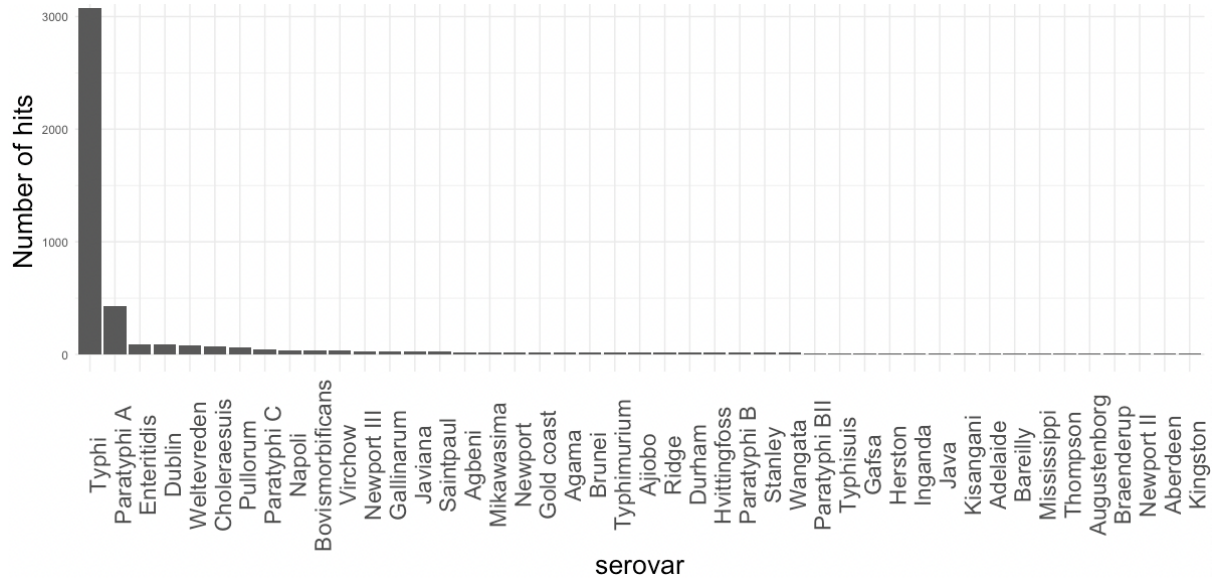

**Figure 3. Prevalence of the *yreP* + regulatory region + *yjcS* segment in *Salmonella* serovars based on BLAST hits.** The top 10 serovars have been described previously as sources of invasive illness. Serovars containing < 5 isolates were removed from this figure for clarity.
